# Supplementary material
Source: PubMed Central journal article supplement (PMC5148700)
Supplement: NIHMS822723-supplement-supplement_1.pdf [file NIHMS822723-supplement-supplement_1.pdf]

# **A Healthcare Navigation Tool Assesses Asthma Self-Management and Health Literacy**

## **Supplementary Tables**

**Luzmercy Perez, BA<sup>1,2</sup>**

**Knashawn Morales, ScD<sup>2,3</sup>**

**Heather Klusaritz, PhD, MSW<sup>2,4</sup>**

**Xiaoyan Han, MS<sup>2,3</sup>**

**Jingru Huang, BA<sup>1,2</sup>**

**Marisa Rogers MD, MPH<sup>2,5</sup>**

**Ian M. Bennett, MD, PhD<sup>6</sup>**

**Cynthia S. Rand, PhD<sup>7</sup>**

**Grace Ndicu, AS<sup>1,2</sup>**

**Andrea J. Apter, MD, MSc, MA<sup>1,2</sup>**

<sup>1</sup>Division of Pulmonary Allergy Critical Care Medicine, <sup>2</sup>Perelman School of Medicine, University of Pennsylvania, <sup>3</sup>Department of Biostatistics and Epidemiology, <sup>4</sup>Department of Family Medicine and Community Health, <sup>5</sup>Division of General Internal Medicine, <sup>6</sup>Departments of Family Medicine & Psychiatry and Behavioral Sciences, University of Washington, Box 354696, Seattle WA 98195-4696, <sup>7</sup>Division of Pulmonary and Critical Care Medicine, Johns Hopkins School of Medicine, Baltimore, Maryland

### **Corresponding author:**

Andrea J. Apter, MD, MSc, MA  
829 Gates Building  
Hospital of the University of Pennsylvania  
3600 Spruce Street  
Philadelphia, PA 19104.  
Telephone: (215) 662-2425  
FAX: (215) 615-0780  
**apter@mail.med.upenn.edu**

**Funding Source: This project was funded by NIH/NHLBI R18 HL116285**

KM has received grant support from Teva Pharmaceutical and Altria Client Services, Inc. AA has received grant support from AstraZeneca Bristol Myers Squibb. CR has consulted for TEVA Pharmaceutical. The remaining authors have no conflicts of interest to declare.

**e-Table 1. Inhaled Corticosteroid Knowledge Questionnaire.**<sup>1,2</sup> The sum of the 5-point Likert score for each item is calculated so that more knowledge on an item results in a higher score.

|                                                                                                                                                              | <b>Definitely True</b> | <b>Mostly True</b> | <b>Don't Know</b> | <b>Mostly False</b> | <b>Definitely False</b> |
|--------------------------------------------------------------------------------------------------------------------------------------------------------------|------------------------|--------------------|-------------------|---------------------|-------------------------|
| 1. Inhaled steroids make airway muscles relax.                                                                                                               | 1                      | 2                  | 3                 | 4                   | 5                       |
| 2. Inhaled steroids work by fighting inflammation.                                                                                                           | 5                      | 4                  | 3                 | 2                   | 1                       |
| 3. Inhaled steroids work by fighting infection.                                                                                                              | 1                      | 2                  | 3                 | 4                   | 5                       |
| 4. The full effect of inhaled steroids depends on regular use and may take days to work.                                                                     | 5                      | 4                  | 3                 | 2                   | 1                       |
| 5. Inhaled steroids make you gain weight.                                                                                                                    | 1                      | 2                  | 3                 | 4                   | 5                       |
| 6. When you use inhaled steroids, your wheeze or chest tightness gets better immediately.                                                                    | 1                      | 2                  | 3                 | 4                   | 5                       |
| 7. The full effect of inhaled steroids begins immediately.                                                                                                   | 1                      | 2                  | 3                 | 4                   | 5                       |
| 8. Even if I have no symptoms from asthma, I should take [say rescue/reliever inhaler they are on] everyday so that I can stop asthma attacks from starting. | 1                      | 2                  | 3                 | 4                   | 5                       |
| 9. Even if I have no symptoms from asthma, I should take [say ICS they are on] everyday so that I can stop asthma attacks from starting.                     | 5                      | 4                  | 3                 | 2                   | 1                       |
| 10. [Say ICS they are on] should be taken only when I have asthma symptoms.                                                                                  | 1                      | 2                  | 3                 | 4                   | 5                       |

**e-Table 2. Measure of Inhaler Corticosteroid Technique.**<sup>3</sup> For each, the score is the sum of the “yes” responses, so that a maximum score for MDI Inhaler Technique is 7, for DPI Inhaler Technique it is 6.

|                                                                                |                  |                 |
|--------------------------------------------------------------------------------|------------------|-----------------|
| <b>MDI Inhaler Technique</b>                                                   |                  |                 |
| 1. Canister shaken                                                             | <sub>1</sub> Yes | <sub>0</sub> No |
| 2. Exhales before actuating inhaler                                            | <sub>1</sub> Yes | <sub>0</sub> No |
| 3. Actuates inhaler at the start or within 1 second of the start of inhalation | <sub>1</sub> Yes | <sub>0</sub> No |
| 4. Actuates only once per inhalation                                           | <sub>1</sub> Yes | <sub>0</sub> No |
| 5. Inhalation takes place over 3-5 seconds                                     | <sub>1</sub> Yes | <sub>0</sub> No |
| 6. Position of inhaler appears adequate                                        | <sub>1</sub> Yes | <sub>0</sub> No |
| 7. Patient holds breath for 6-10 seconds                                       | <sub>1</sub> Yes | <sub>0</sub> No |
|                                                                                |                  |                 |
| <b>DPI Inhaler Technique</b>                                                   | <sub>1</sub> Yes | <sub>0</sub> No |
| 1. Exposes mouthpiece                                                          | <sub>1</sub> Yes | <sub>0</sub> No |
| 2. Cocks the triggers (activates the diskus)                                   | <sub>1</sub> Yes | <sub>0</sub> No |
| 3. Holds diskus horizontally while inhaling                                    | <sub>1</sub> Yes | <sub>0</sub> No |
| 4. Inhales deeply                                                              | <sub>1</sub> Yes | <sub>0</sub> No |
| 5. Holds breath 6 seconds                                                      | <sub>1</sub> Yes | <sub>0</sub> No |
| 6. Does not blow into diskus                                                   | <sub>1</sub> Yes | <sub>0</sub> No |

1. Apter AJ, Reisine ST, Affleck G, Barrows E, ZuWallack RL. Adherence with twice-daily dosing of inhaled steroids. Socioeconomic and health-belief differences. *Am J Respir Crit Care Med.* 1998;157(6 Pt 1):1810-1817.
2. Apter AJ, Boston R, George M, et al. Modifiable barriers to adherence to inhaled steroids among adults with asthma: it's not just black and white. *J Allergy Clin Immunol.* 2003;111(6):1219-1226.
3. *Expert Panel Report 3: Guidelines for the diagnosis and management of asthma* Bethesda, MD: National Institutes of Health, National Heart, Lung, and Blood Institute;2007.
